# Supplementary material for: Association of BMI with overall survival in patients with mCRC who received chemotherapy versus EGFR and VEGF-targeted therapies
Source: PubMed Central journal article supplement (PMC4618617; doi:10.1002/cam4.490), 2015-07-25
Supplement: cam40004-1461-sd1.pdf [file cam40004-1461-sd1.pdf]

## Supplementary Figure

|                             |                   | Hazard ratio | 95% CI           | P value          |
|-----------------------------|-------------------|--------------|------------------|------------------|
| BMI group                   | <b>Normal</b>     | 1.00         | -                | -                |
|                             | <b>Overweight</b> | 1.08         | 0.88-1.33        | 0.454            |
|                             | <b>Obese I</b>    | 1.07         | 0.81-1.42        | 0.629            |
|                             | <b>Obese II</b>   | 0.84         | 0.57-1.23        | 0.375            |
| Age (>70)                   |                   | <b>1.01</b>  | <b>1.00-1.02</b> | <b>0.033</b>     |
| Sex (Male)                  |                   | 0.85         | 0.71-1.03        | 0.091            |
| Synchronous disease         |                   | 1.14         | 0.93-1.39        | 0.201            |
| > 1met site                 |                   | <b>1.54</b>  | <b>1.26-1.88</b> | <b>&lt;0.001</b> |
| No of lines of chemotherapy | <b>1</b>          | R            |                  |                  |
|                             | <b>2</b>          | 0.82         | 0.66-1.00        | 0.055            |
|                             | <b>3</b>          | <b>0.72</b>  | <b>0.55-0.95</b> | <b>0.018</b>     |
|                             | <b>4</b>          | <b>0.62</b>  | <b>0.40-0.85</b> | <b>0.027</b>     |
|                             | <b>5+</b>         | <b>0.38</b>  | <b>0.16-0.93</b> | <b>0.034</b>     |

**Supplementary Table 1. Multivariate Cox proportional hazard model (hazard ratio (HR) and 95% CI) for overall survival by BMI for chemotherapy only group, Model was adjusted by synchronous disease, >1met site, number of lines of chemotherapy and number of lines**
